# Supplementary material
Source: PubMed Central journal article supplement (PMC7867400)
Supplement: mmc2.pdf [file mmc2.pdf]

**Supplement B: Types of Surgical Procedures by Area of Surgical Specialty (N=135)**

| Procedure                   | N (%)     |
|-----------------------------|-----------|
| Plastic Surgery             | 82 (60.7) |
| Breast Procedures           | 48 (35.6) |
| General Plastic Surgery     | 19 (14.1) |
| Head & Neck Plastic Surgery | 16 (11.9) |
| General Surgery             | 53 (39.3) |
| Colon, Rectum, Anus         | 6 (4.4)   |
| Endocrine Surgery           | 9 (6.7)   |
| Hernias                     | 21 (15.6) |
| Upper GI                    | 16 (11.9) |
